# Supplementary material for: Associations between Neuropsychiatric Symptoms and Alzheimer’s Disease Biomarkers in People with Mild Cognitive Impairment
Source: MDPI journal article supplement (doi:10.3390/brainsci13081195), 2023-08-12
Supplement: s1 [file s1]

**Table S1.** Differences in the prevalence of individual neuropsychiatric symptoms between patient groups (*Chi-square* test). All values are frequencies (proportions).

| Symptom                   | No NPS ( <i>n</i> = 198) | Mild NPS ( <i>n</i> = 160) | Severe NPS ( <i>n</i> = 148) | $\chi^2$       | <i>p</i> |
|---------------------------|--------------------------|----------------------------|------------------------------|----------------|----------|
| Delusions                 | 0 (0.0%)                 | <b>0 (0.0%)</b>            | <b>7 (4.7%)</b>              | - <sup>a</sup> | <0.001   |
| Hallucinations            | 0 (0.0%)                 | 0 (0.0%)                   | 3 (2.0%)                     | - <sup>a</sup> | 0.025    |
| Agitation                 | 0 (0.0%)                 | <b>28 (17.5%)</b>          | <b>58 (39.5%)</b>            | 92.24          | <0.001   |
| Depression                | 0 (0.0%)                 | <b>43 (26.9%)</b>          | <b>83 (56.1%)</b>            | 142.92         | <0.001   |
| Anxiety                   | 0 (0.0%)                 | <b>16 (10.0%)</b>          | <b>58 (39.5%)</b>            | 109.07         | <0.001   |
| Euphoria                  | 0 (0.0%)                 | <b>0 (0.0%)</b>            | <b>13 (8.8%)</b>             | - <sup>a</sup> | <0.001   |
| Apathy                    | 0 (0.0%)                 | <b>14 (8.8%)</b>           | <b>64 (43.2%)</b>            | 129.44         | <0.001   |
| Disinhibition             | 0 (0.0%)                 | <b>4 (2.5%)</b>            | <b>43 (29.1%)</b>            | 97.65          | <0.001   |
| Irritability              | 0 (0.0%)                 | <b>44 (27.5%)</b>          | <b>93 (63.3%)</b>            | 179.83         | <0.001   |
| Aberrant motor behaviours | 0 (0.0%)                 | 8 (5.0%)                   | 14 (9.5%)                    | 18.60          | <0.001   |
| Night-time behaviours     | 0 (0.0%)                 | <b>38 (31.1%)</b>          | <b>60 (40.5%)</b>            | 91.63          | <0.001   |
| Appetite                  | 0 (0.0%)                 | <b>8 (5.0%)</b>            | <b>39 (26.4%)</b>            | 92.49          | <0.001   |

NPS: Neuropsychiatric symptoms

<sup>a</sup> *Fisher's Exact Test*

In bold: rates significantly different between patient groups with mild and severe neuropsychiatric symptoms
